# Supplementary material for: Endothelin-1 Induces Cell Proliferation and Myofibroblast Differentiation through the ETAR/Gαq/ERK Signaling Pathway in Human Cardiac Fibroblasts
Source: MDPI journal article supplement (doi:10.3390/ijms24054475), 2023-02-24

## Supplementary information

### Supplementary figures

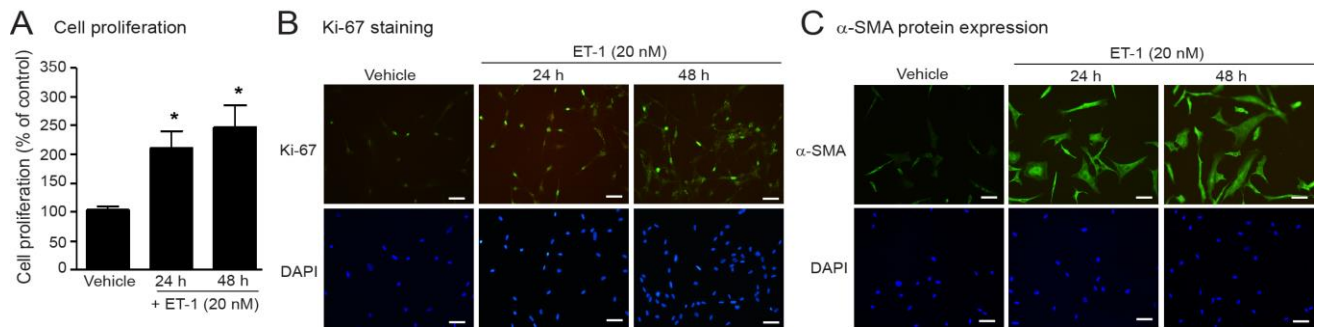

**Figure S1. Treatment with ET-1 up to 48 h induced cell proliferation and  $\alpha$ -SMA expression**  
 (A-B) Cells were treated with 20 nM ET-1 for the indicated time. (A) Cell proliferation was expressed as the percentage relative to vehicle-treated group, and shown as [the mean  \$\pm\$  SD](#). \* $P < 0.05$  versus vehicle. (B) Proliferative capacity of fibroblasts was determined by Ki-67 immunofluorescence assay. Cells were stained for Ki-67 (green) and nucleus DAPI (blue). Scale bar represents 10  $\mu$ m. (C)  $\alpha$ -SMA protein expression was visualized by fluorescent microscope. Cells were stained for  $\alpha$ -SMA (green) and nucleus DAPI (blue). Scale bar represents 10  $\mu$ m. Data are obtained from 3 independent repetitions (N = 3).

### Cell cytotoxicity of specific inhibitors

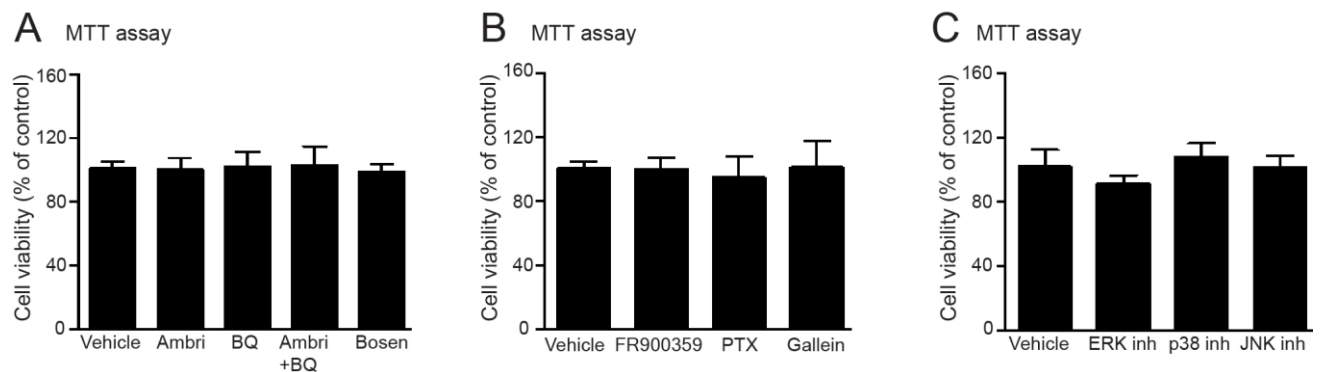

**Figure S2. Effects of each inhibitor on cell cytotoxicity as determined by MTT assay**

(A-C) Cells were treated with each inhibitor at the indicated concentrations for 48 hours. Cell viability was quantified and expressed as the percentage of cell viability. Data are shown as [the mean  \$\pm\$  SD](#) from 3 independent repetitions (N = 3).

**Figure S3. The whole uncropped images of western blots presented in Figure 4E and 4F**

The whole blott at specific molecular weight for p-ERK-1/2 (44, 42 kDa), ERK-1/2 (44, 42 kDa), and  $\beta$ -actin (45 kDa)

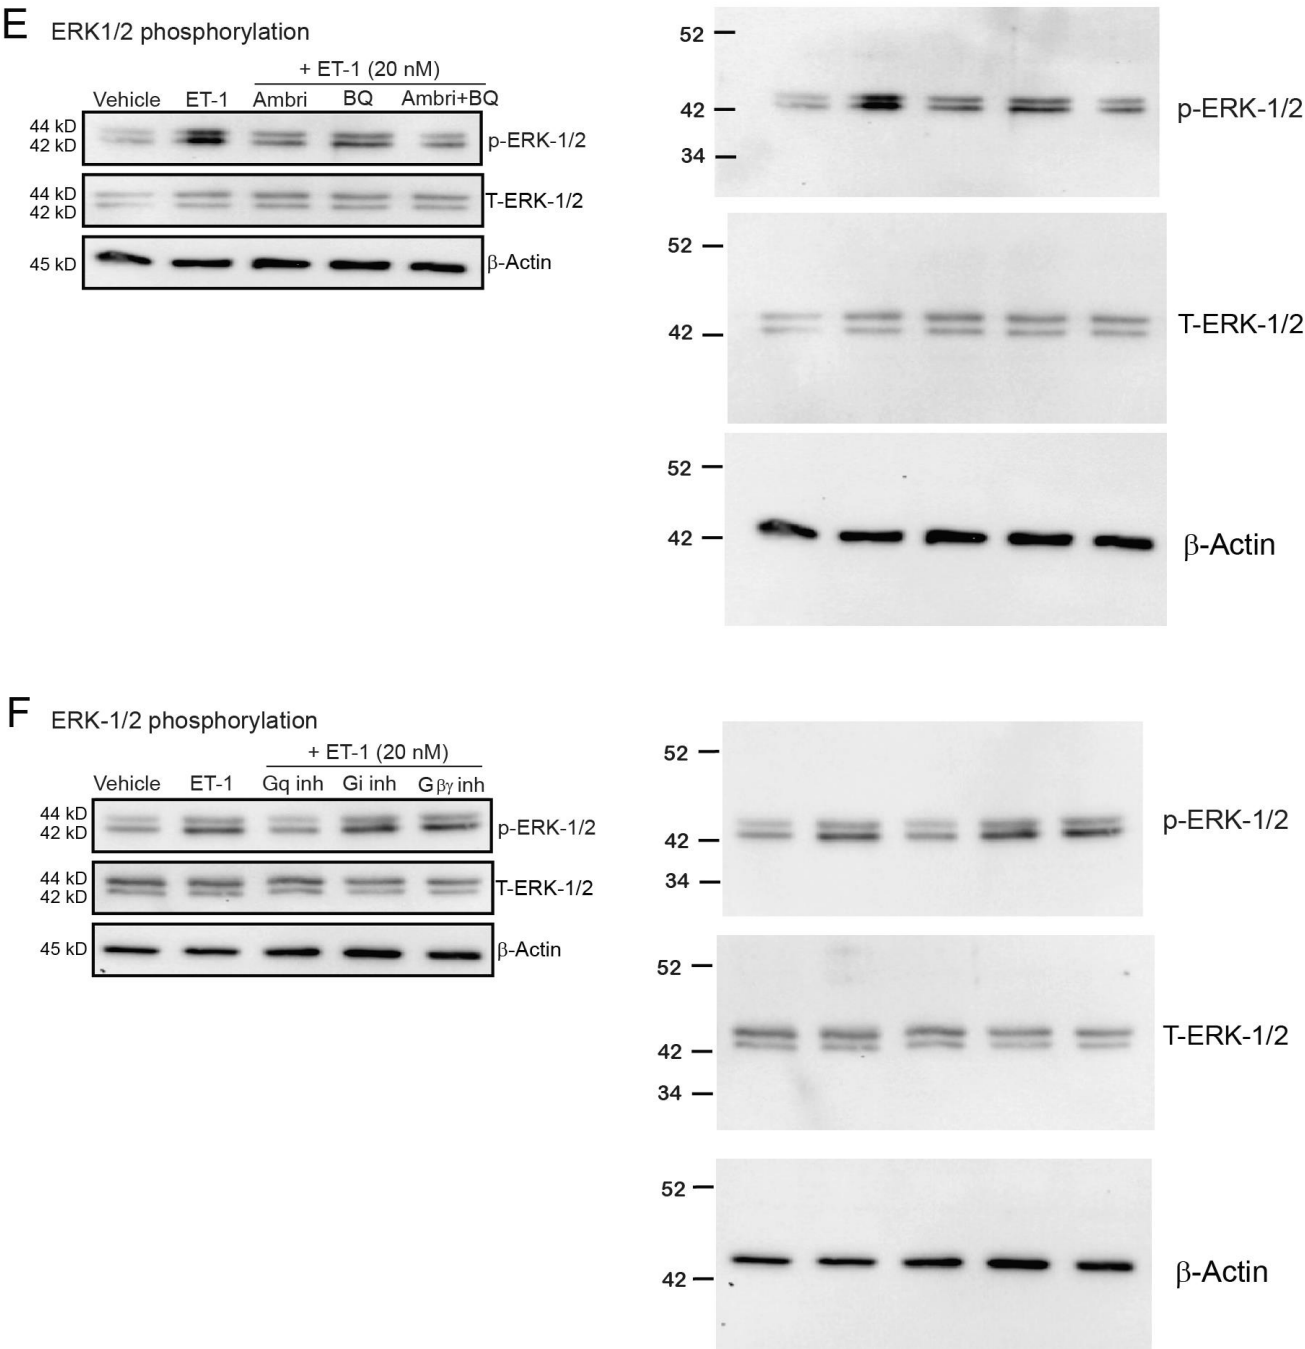



# Figure 4F

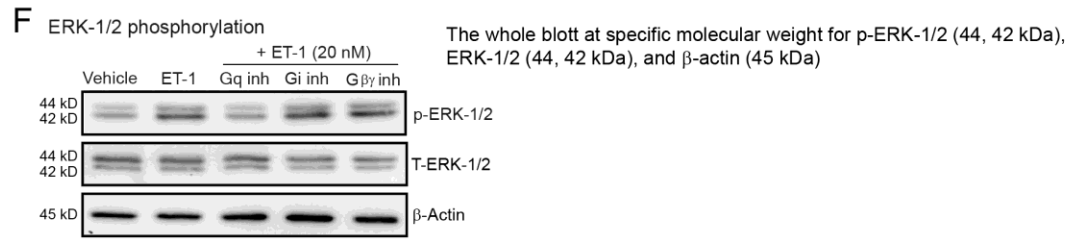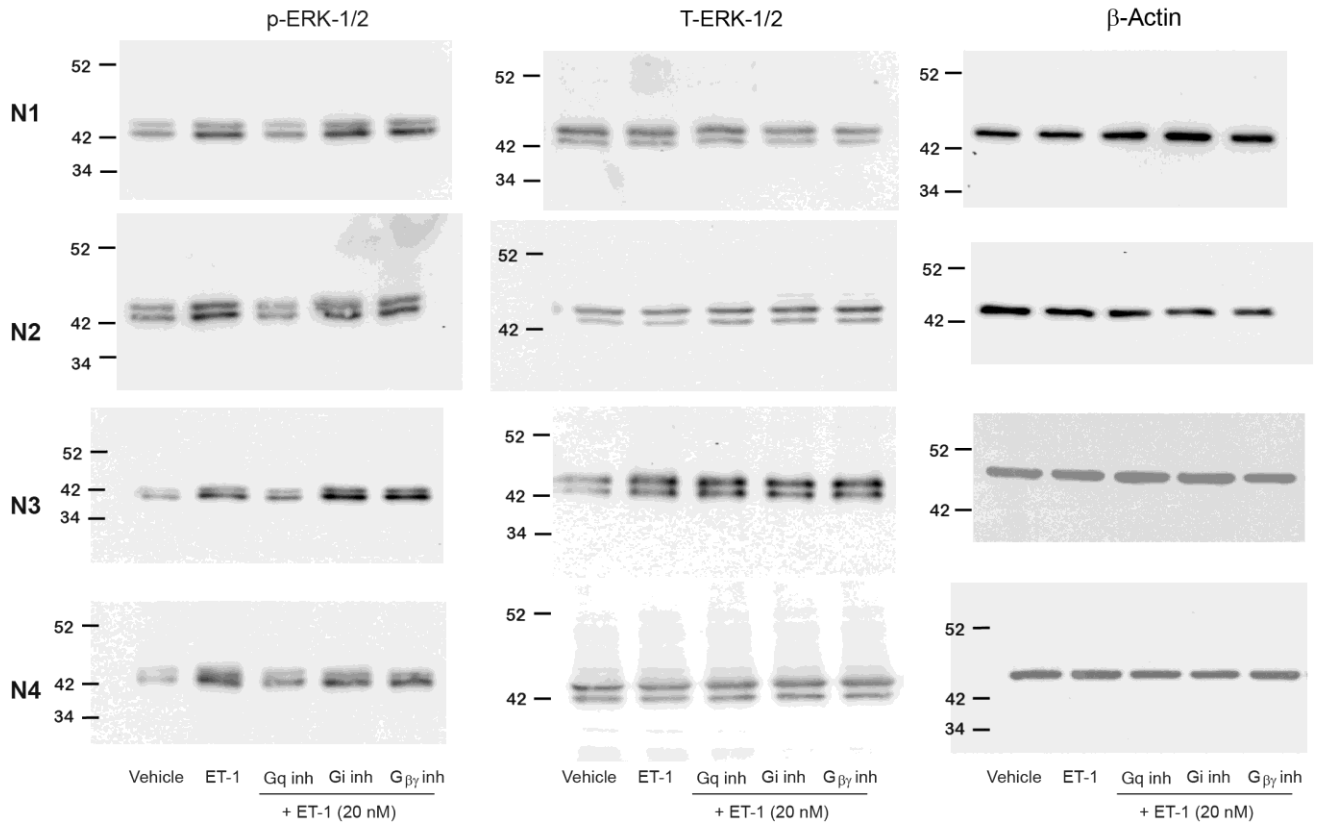

Supplement: s1 [file s1]
